# Supplementary material for: Fructose/dioxygen biofuel cell based on direct electron transfer-type bioelectrocatalysis
Source: Royal Society of Chemistry journal article supplement (doi:10.1039/b617650j), 2007-01-01
Supplement: b617650j.pdf [file b617650j.pdf]

**Fructose/dioxygen biofuel cell based on direct electron transfer-type  
bioelectrocatalysis**

Yuji Kamitaka,<sup>1</sup> Seiya Tsujimura,<sup>1\*</sup> Norihiko Setoyama,<sup>2</sup> Tsutomu Kajino<sup>2</sup> and Kenji Kano<sup>1\*</sup>

<sup>1</sup>*Division of Applied Life Sciences, Graduate School of Agriculture, Kyoto University, Sakyo-ku,*

*Kyoto 606-8502, Japan. E-mail: seiya@kais.kyoto-u.ac.jp(S.T.) and*

*kkano@kais.kyoto-u.ac.jp(K.K.)*

<sup>2</sup>*Toyota Central R & D Labs Inc., Yokomichi, Nagakute, Aichi, 480-1192, Japan*

**Supplement Information**

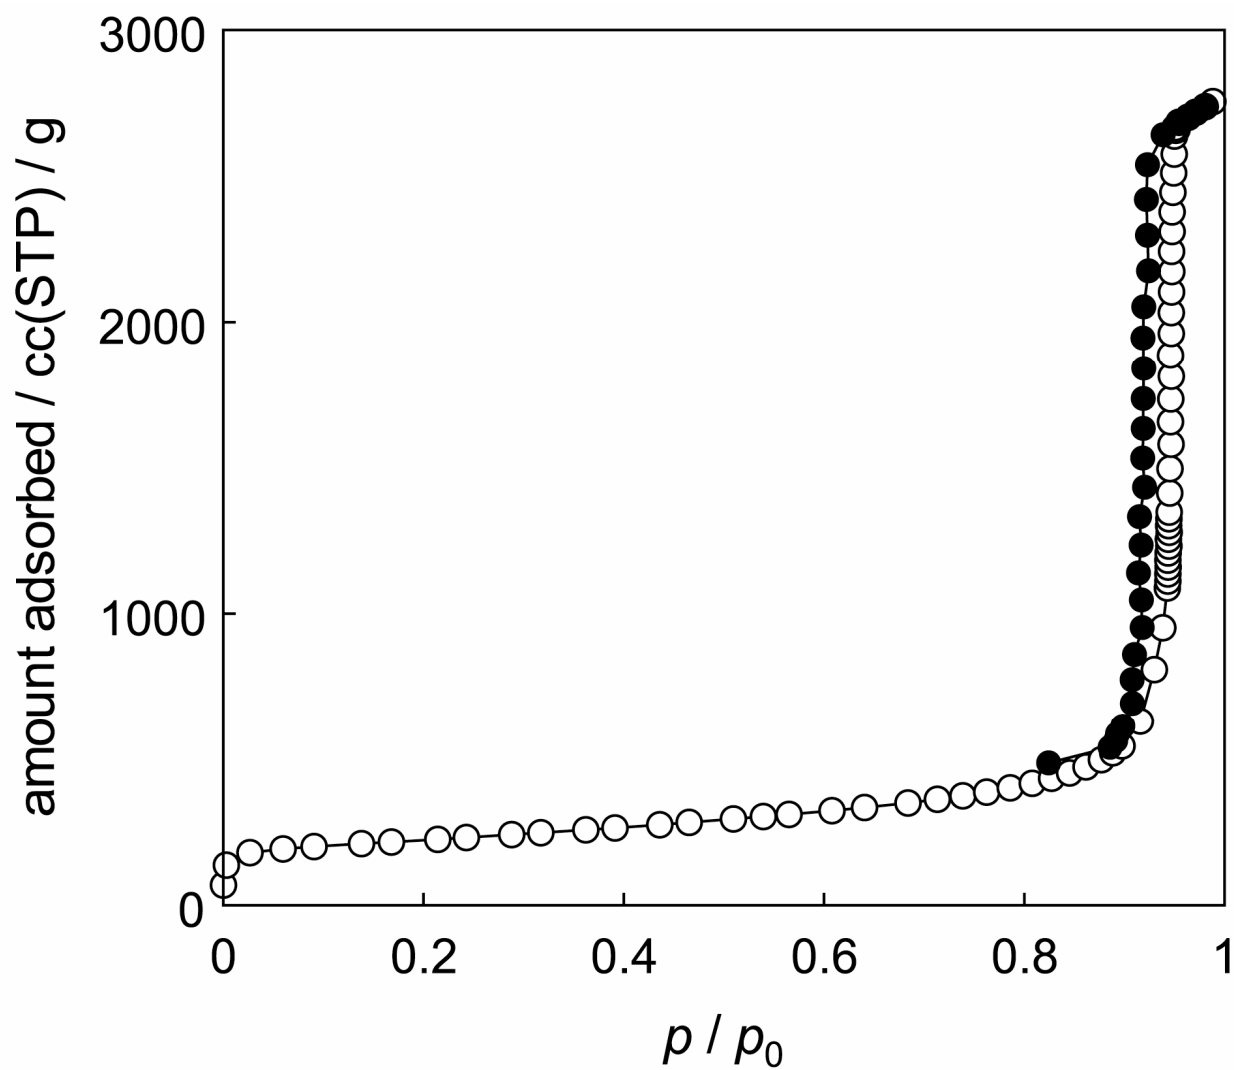

Fig. S1 Nitrogen adsorption (○) and desorption (●) isotherms at the carbon aerogel used. The data are taken at 77 K.

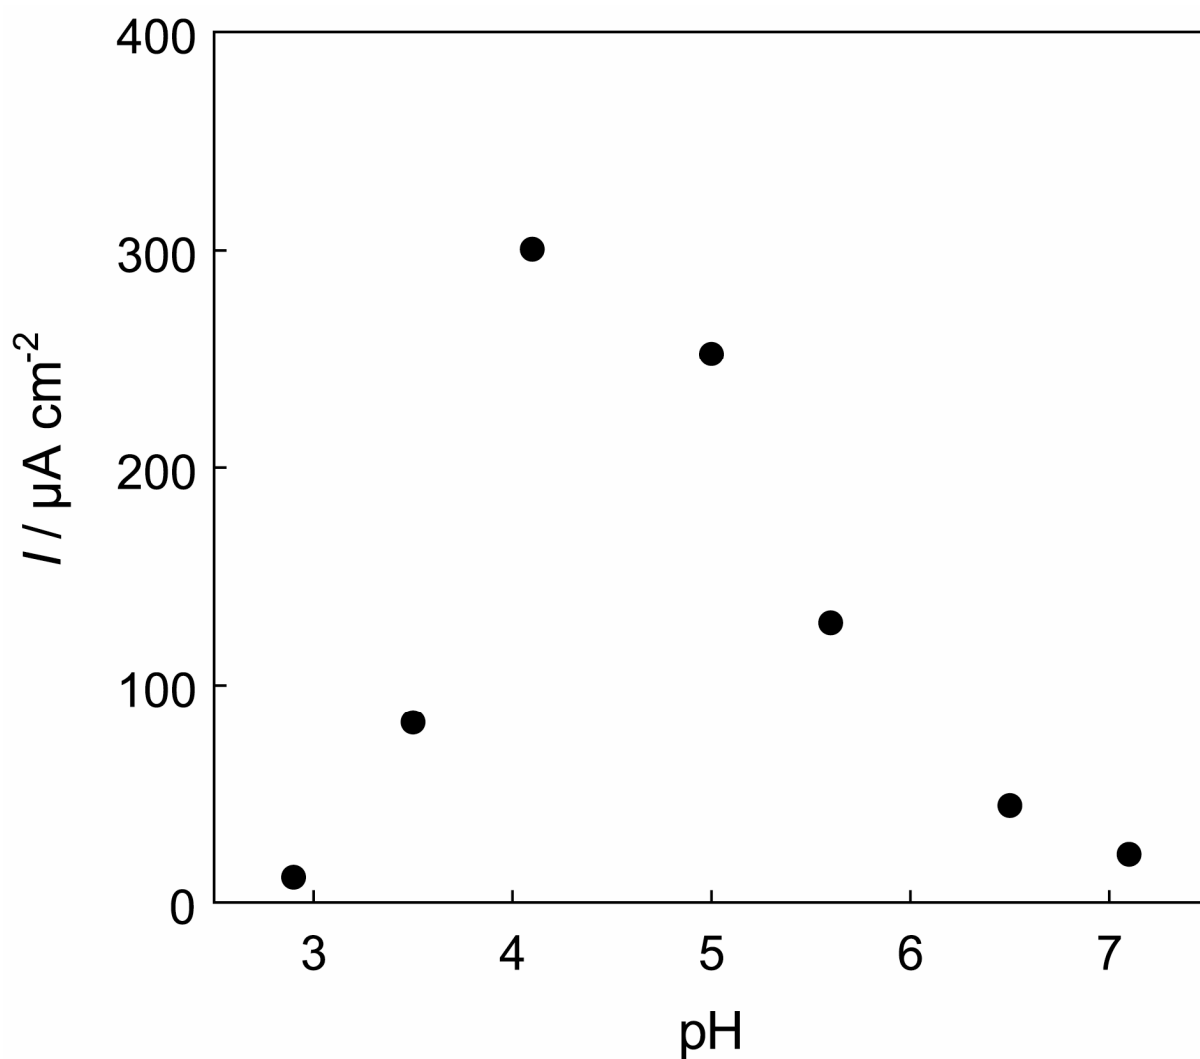

Fig. S2 pH dependence of the current density ( $I$ ) of the D-fructose oxidation catalyzed by FDH adsorbed on HOPG electrodes (edge plane). Adsorption (for 1 h under stirring) and electrochemical measurements were carried out in McIlvaine buffers (for pH 3–6.5) and a phosphate buffer (pH 7) containing 200 mM D-fructose at room temperature ( $25 \pm 2$  °C) and at 500 mV.

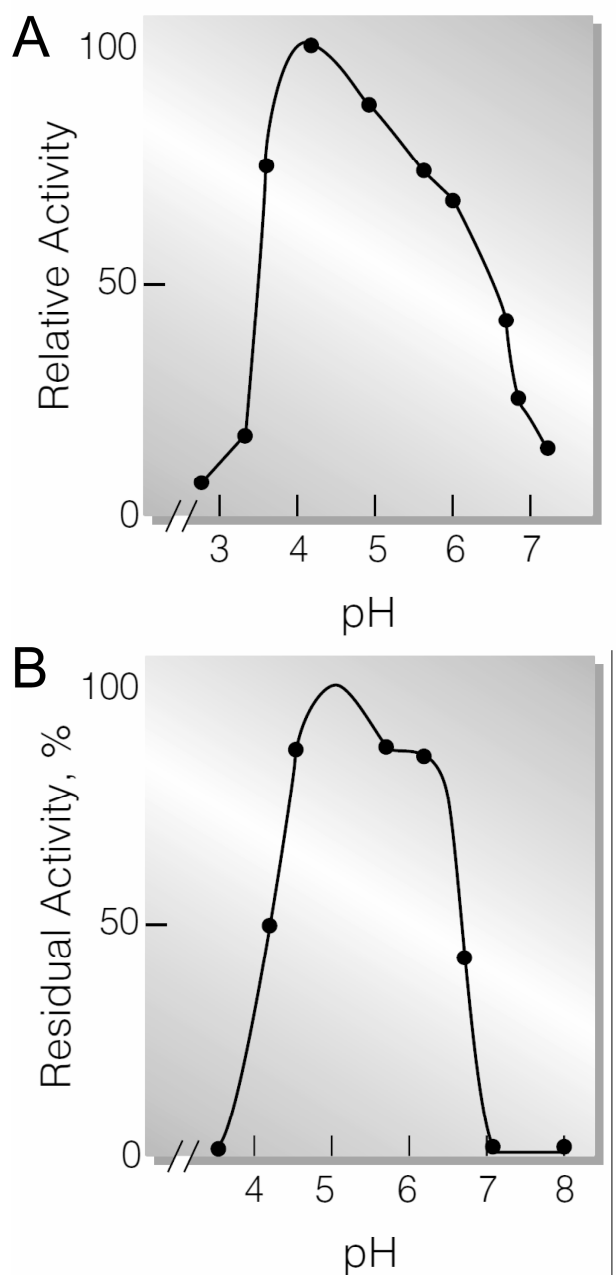

Fig. S3 (A) pH dependence of the relative activity of FDH (5-min reaction at 37 °C in McIlvaine buffer) and (B) pH dependence of stability of FDH (16-h treatment at 25 °C in McIlvaine buffer). The data are taken from Technical Brochure of Toyobo Enzymes Co. ([http://www.toyobo.co.jp/e/seihin/xr/enzyme/pdf\\_files/089\\_092FCD-302.pdf](http://www.toyobo.co.jp/e/seihin/xr/enzyme/pdf_files/089_092FCD-302.pdf))
